# Supplementary material for: Long-day photoperiod and cool temperature induce flowering in cassava: Expression of signaling genes
Source: Front Plant Sci. 2022 Sep 16;13:973206. doi: 10.3389/fpls.2022.973206 (PMC9523484; doi:10.3389/fpls.2022.973206)
Supplement: Supplementary file 8 [file Table_7.XLSX]

## Sheet: enrichment temprtr 34up
ShinyGO analysis of enrichment. Genes significantly upregulated at 34C relative to 22C.
Enrichment FDR	Genes in list	Total genes	Functional Category	Genes
2.51e-26	298	2378	Response to abiotic stimulus	AT1G01720 AT1G07400 AT1G13360 AT1G19020 AT1G19530 AT1G23710 AT1G25560 AT1G54050 AT1G74310 AT1G78070 AT2G26150 AT2G36800 AT2G40000 AT2G47730 AT3G03270 AT3G10020 AT3G24500 AT3G49780 AT3G56400 AT4G10250 AT4G27450 AT4G33070 AT5G12020 AT5G24530 AT5G35735 AT5G37670 AT5G39890 AT5G42050 AT5G54940 AT5G58070 AT5G64260 AT1G05010 AT1G07090 AT1G16030 AT1G28520 AT1G47990 AT1G51550 AT1G53540 AT1G65580 AT1G75540…
1.36e-25	435	4050	Response to stress	AT1G01720 AT1G07400 AT1G13360 AT1G19020 AT1G19530 AT1G23710 AT1G25560 AT1G54050 AT1G74310 AT1G78070 AT2G26150 AT2G36800 AT2G40000 AT2G47730 AT3G03270 AT3G10020 AT3G24500 AT3G49780 AT3G56400 AT4G10250 AT4G27450 AT4G33070 AT5G12020 AT5G24530 AT5G35735 AT5G37670 AT5G39890 AT5G42050 AT5G54940 AT5G58070 AT5G64260 AT1G05010 AT1G06410 AT1G07890 AT1G08390 AT1G08450 AT1G08830 AT1G12210 AT1G16030 AT1G19180…
4.13e-22	235	1820	Response to oxygen-containing compound	AT1G05010 AT1G07400 AT1G07530 AT1G07890 AT1G08830 AT1G12580 AT1G19180 AT1G20950 AT1G50420 AT1G53540 AT1G54050 AT1G65580 AT1G68360 AT1G74950 AT2G19310 AT2G21490 AT2G37430 AT2G38310 AT2G38910 AT3G09640 AT3G16350 AT3G63010 AT4G08390 AT4G10250 AT4G32570 AT4G32870 AT4G35090 AT5G12020 AT5G27320 AT5G37670 AT5G52920 AT5G53160 AT5G58070 AT1G17840 AT1G20510 AT2G36690 AT2G37170 AT3G53180 AT3G56400 AT3G56850…
3.7e-19	359	3397	Response to chemical	AT1G01720 AT1G07400 AT1G13360 AT1G19020 AT1G19530 AT1G23710 AT1G25560 AT1G54050 AT1G74310 AT1G78070 AT2G26150 AT2G36800 AT2G40000 AT2G47730 AT3G03270 AT3G10020 AT3G24500 AT3G49780 AT3G56400 AT4G10250 AT4G27450 AT4G33070 AT5G12020 AT5G24530 AT5G35735 AT5G37670 AT5G39890 AT5G42050 AT5G54940 AT5G58070 AT5G64260 AT1G05010 AT1G07530 AT1G07890 AT1G08450 AT1G08830 AT1G12580 AT1G16030 AT1G19180 AT1G20950…
3.29e-17	61	247	Response to heat	AT1G07400 AT1G16030 AT1G53540 AT1G54050 AT1G74310 AT2G19310 AT2G25140 AT2G26150 AT2G41690 AT3G12580 AT3G22830 AT4G10250 AT4G18880 AT4G36990 AT5G02500 AT5G09590 AT5G12020 AT5G15450 AT5G37670 AT5G42020 AT5G52640 AT5G56000 AT5G62020 AT4G21320 AT4G29520 AT1G28210 AT5G22060 AT1G07890 AT1G15520 AT1G17870 AT1G54490 AT1G79930 AT2G04030 AT2G38470 AT2G40340 AT3G22840 AT3G23990 AT3G24500 AT4G02450 AT4G12400…
1.45e-14	341	3401	Cellular response to stimulus	AT1G01720 AT1G07400 AT1G13360 AT1G19020 AT1G19530 AT1G23710 AT1G25560 AT1G54050 AT1G74310 AT1G78070 AT2G26150 AT2G36800 AT2G40000 AT2G47730 AT3G03270 AT3G10020 AT3G24500 AT3G49780 AT3G56400 AT4G10250 AT4G27450 AT4G33070 AT5G12020 AT5G24530 AT5G35735 AT5G37670 AT5G39890 AT5G42050 AT5G54940 AT5G58070 AT5G64260 AT1G02130 AT1G05010 AT1G06410 AT1G07890 AT1G08390 AT1G08450 AT1G08830 AT1G12310 AT1G12580…
1.74e-14	252	2303	Response to organic substance	AT1G05010 AT1G07530 AT1G08450 AT1G12580 AT1G16030 AT1G19180 AT1G20950 AT1G50420 AT1G65580 AT1G68360 AT1G74310 AT1G74950 AT2G21490 AT2G23780 AT2G25140 AT2G37430 AT2G38310 AT2G38910 AT2G40950 AT3G07370 AT3G12580 AT3G16350 AT3G17611 AT3G63010 AT4G03510 AT4G08320 AT4G08850 AT4G29330 AT4G30850 AT4G32570 AT4G32870 AT4G39400 AT5G02500 AT5G03340 AT5G09590 AT5G15450 AT5G27320 AT5G39340 AT5G42020 AT5G52920…
1.24e-13	166	1337	Cellular response to stress	AT1G01720 AT1G07400 AT1G13360 AT1G19020 AT1G19530 AT1G23710 AT1G25560 AT1G54050 AT1G74310 AT1G78070 AT2G26150 AT2G36800 AT2G40000 AT2G47730 AT3G03270 AT3G10020 AT3G24500 AT3G49780 AT3G56400 AT4G10250 AT4G27450 AT4G33070 AT5G12020 AT5G24530 AT5G35735 AT5G37670 AT5G39890 AT5G42050 AT5G54940 AT5G58070 AT5G64260 AT1G05010 AT1G06410 AT1G07890 AT1G08390 AT1G08450 AT1G08830 AT1G16030 AT1G24290 AT1G29690…
2.06e-13	136	1018	Response to inorganic substance	AT1G05010 AT1G07400 AT1G08830 AT1G53540 AT1G54050 AT2G19310 AT2G21490 AT4G10250 AT4G35090 AT5G12020 AT5G37670 AT5G44070 AT5G61910 AT1G52827 AT4G20260 AT5G20720 AT1G02130 AT1G05680 AT1G07890 AT1G07930 AT1G15520 AT1G17870 AT1G27320 AT1G31770 AT1G34550 AT1G54100 AT1G66340 AT1G68010 AT1G70000 AT1G74310 AT1G75280 AT1G78080 AT1G78380 AT1G79930 AT2G14210 AT2G17840 AT2G18050 AT2G26150 AT2G30860 AT2G30970…
4.55e-12	85	534	Response to bacterium	AT2G37710 AT3G53810 AT4G23180 AT4G23220 AT4G25030 AT4G29050 AT5G06740 AT5G10530 AT1G20510 AT1G27320 AT2G46370 AT4G35090 AT1G08830 AT1G16670 AT1G26190 AT1G80840 AT2G23770 AT2G30860 AT2G32700 AT2G37660 AT2G47730 AT3G12580 AT3G15352 AT3G16640 AT3G25180 AT3G45140 AT3G50260 AT3G53180 AT3G56400 AT4G03280 AT4G09650 AT4G20260 AT4G23810 AT4G31550 AT4G32551 AT4G37990 AT5G24530 AT5G56980 AT1G28520 AT4G33300…
5.6e-12	198	1772	Cellular response to chemical stimulus	AT1G01720 AT1G07400 AT1G13360 AT1G19020 AT1G19530 AT1G23710 AT1G25560 AT1G54050 AT1G74310 AT1G78070 AT2G26150 AT2G36800 AT2G40000 AT2G47730 AT3G03270 AT3G10020 AT3G24500 AT3G49780 AT3G56400 AT4G10250 AT4G27450 AT4G33070 AT5G12020 AT5G24530 AT5G35735 AT5G37670 AT5G39890 AT5G42050 AT5G54940 AT5G58070 AT5G64260 AT1G05010 AT1G07890 AT1G08450 AT1G08830 AT1G12580 AT1G16030 AT1G19180 AT1G53670 AT1G65580…
6.73e-12	184	1612	Post-embryonic development	AT1G05010 AT1G28520 AT1G75540 AT2G30370 AT3G17609 AT3G24140 AT3G63010 AT5G11260 AT5G19620 AT5G24860 AT5G27320 AT5G13790 AT2G16365 AT2G26000 AT2G32700 AT2G35230 AT2G43410 AT3G57230 AT4G02020 AT4G15415 AT4G16280 AT4G22140 AT4G32551 AT5G08230 AT5G14530 AT5G27230 AT5G37055 AT5G45600 AT5G60410 AT5G61380 AT5G61850 AT1G14440 AT1G66730 AT2G22900 AT3G55850 AT3G56400 AT5G41700 AT5G56860 AT1G05230 AT1G08970…
8.06e-12	364	3874	Regulation of metabolic process	AT1G05460 AT1G07350 AT1G07530 AT1G08370 AT1G08390 AT1G08970 AT1G12855 AT1G14440 AT1G15750 AT1G16710 AT1G21450 AT1G21650 AT1G24290 AT1G24450 AT1G25580 AT1G28470 AT1G28520 AT1G30480 AT1G35660 AT1G48310 AT1G50420 AT1G50600 AT1G51060 AT1G54490 AT1G55325 AT1G55830 AT1G63700 AT1G67310 AT1G67580 AT1G68320 AT1G69600 AT1G75390 AT1G75510 AT1G75540 AT1G77300 AT1G77680 AT1G79640 AT1G80490 AT2G03510 AT2G17410…
1.05e-11	45	194	Protein folding	AT1G07400 AT1G08450 AT1G12060 AT1G16030 AT1G23100 AT1G28210 AT1G53540 AT1G54050 AT1G72280 AT2G04030 AT2G15790 AT2G19310 AT2G20560 AT3G07770 AT3G12050 AT3G12580 AT3G13470 AT3G23710 AT3G23990 AT3G25230 AT4G02450 AT4G08320 AT4G10250 AT4G13830 AT4G24190 AT4G33350 AT5G02500 AT5G09590 AT5G12020 AT5G18820 AT5G20720 AT5G37670 AT5G42020 AT5G48570 AT5G52640 AT5G53400 AT5G56000 AT5G58110 AT4G04330 AT4G29520…
1.36e-11	284	2855	Multicellular organism development	AT1G05010 AT1G28520 AT1G65580 AT1G67260 AT1G75540 AT2G30370 AT2G45190 AT2G48120 AT3G15510 AT3G17609 AT3G24140 AT3G50660 AT3G63010 AT4G29460 AT5G11260 AT5G14400 AT5G19620 AT5G24860 AT5G27320 AT5G36110 AT5G13790 AT1G07090 AT1G15750 AT1G19270 AT1G23550 AT1G24450 AT1G27320 AT1G29460 AT1G31770 AT1G34320 AT1G55325 AT1G58250 AT1G63700 AT1G68360 AT2G01620 AT2G14210 AT2G16365 AT2G26000 AT2G26890 AT2G27230…
5.16e-11	95	662	Response to temperature stimulus	AT1G07400 AT1G16030 AT1G53540 AT1G54050 AT1G74310 AT2G19310 AT2G21490 AT2G25140 AT2G26150 AT2G41690 AT3G12580 AT3G22830 AT4G10250 AT4G18880 AT4G36990 AT5G02500 AT5G09590 AT5G12020 AT5G15450 AT5G37670 AT5G42020 AT5G52640 AT5G56000 AT5G58770 AT5G62020 AT4G08500 AT4G21320 AT4G29520 AT1G28210 AT5G22060 AT1G07890 AT1G15520 AT1G17870 AT1G24620 AT1G27320 AT1G54490 AT1G78080 AT1G79440 AT1G79930 AT2G04030…
3.37e-10	147	1255	Cellular response to organic substance	AT1G08450 AT1G12580 AT1G16030 AT1G19180 AT1G65580 AT1G68360 AT1G74950 AT2G23780 AT2G38310 AT2G38910 AT2G40950 AT3G07370 AT3G12580 AT3G17611 AT3G63010 AT4G03510 AT4G08850 AT4G29330 AT4G32570 AT4G32870 AT4G39400 AT5G02500 AT5G03340 AT5G09590 AT5G27320 AT5G39340 AT5G42020 AT5G52920 AT5G53160 AT3G56400 AT4G31550 AT5G46570 AT1G02120 AT1G03670 AT1G05180 AT1G07910 AT1G15520 AT1G24020 AT1G25560 AT1G27320…
3.6e-10	307	3238	Anatomical structure development	AT1G05010 AT1G28520 AT1G65580 AT1G67260 AT1G68360 AT1G75540 AT2G21630 AT2G30370 AT2G45190 AT2G48120 AT3G15510 AT3G17609 AT3G24140 AT3G50660 AT3G63010 AT4G29460 AT5G11260 AT5G14400 AT5G15680 AT5G19620 AT5G24860 AT5G27320 AT5G36110 AT3G12160 AT5G13790 AT1G05570 AT1G07090 AT1G15750 AT1G19270 AT1G23550 AT1G24450 AT1G27320 AT1G29460 AT1G31770 AT1G34320 AT1G55325 AT1G58250 AT1G63700 AT2G01620 AT2G14210…
3.68e-10	104	781	Response to light stimulus	AT1G07090 AT1G28520 AT1G47990 AT1G51550 AT1G65580 AT1G75540 AT2G31160 AT2G31190 AT2G48120 AT3G05210 AT3G15620 AT3G17609 AT3G17611 AT5G11260 AT5G58760 AT1G66730 AT2G20180 AT4G27670 AT5G61270 AT1G09530 AT2G16365 AT3G60680 AT4G02020 AT4G10180 AT4G11110 AT4G35090 AT1G07180 AT1G08830 AT1G14440 AT1G17420 AT1G17870 AT1G21400 AT1G22280 AT1G54050 AT1G64860 AT1G68010 AT1G74310 AT1G78080 AT1G80920 AT2G17840…
5.02e-10	106	807	Response to radiation	AT1G07090 AT1G28520 AT1G47990 AT1G51550 AT1G65580 AT1G75540 AT2G31160 AT2G31190 AT2G48120 AT3G05210 AT3G15620 AT3G17609 AT3G17611 AT5G11260 AT5G58760 AT1G66730 AT2G20180 AT4G27670 AT5G61270 AT1G09530 AT2G16365 AT3G60680 AT4G02020 AT4G10180 AT4G11110 AT4G35090 AT1G07180 AT1G08830 AT1G14440 AT1G17420 AT1G17870 AT1G21400 AT1G22280 AT1G54050 AT1G64860 AT1G68010 AT1G74310 AT1G78080 AT1G80920 AT2G17840…
6.27e-10	328	3533	Regulation of cellular metabolic process	AT1G07350 AT1G07530 AT1G08390 AT1G08970 AT1G12855 AT1G14440 AT1G15750 AT1G16710 AT1G21450 AT1G21650 AT1G24290 AT1G25580 AT1G28470 AT1G28520 AT1G30480 AT1G35660 AT1G48310 AT1G50420 AT1G50600 AT1G51060 AT1G55325 AT1G55830 AT1G63700 AT1G67310 AT1G68320 AT1G69600 AT1G75390 AT1G75510 AT1G75540 AT1G77300 AT1G79640 AT1G80490 AT2G03510 AT2G17410 AT2G18050 AT2G18350 AT2G19930 AT2G26150 AT2G26430 AT2G27230…
7.49e-10	302	3198	Multicellular organismal process	AT1G05010 AT1G28520 AT1G65580 AT1G67260 AT1G75540 AT2G30370 AT2G45190 AT2G48120 AT3G15510 AT3G15620 AT3G17609 AT3G24140 AT3G50660 AT3G63010 AT4G29460 AT5G11260 AT5G14400 AT5G19620 AT5G24860 AT5G27320 AT5G36110 AT3G12160 AT5G13790 AT1G07090 AT1G11300 AT1G11340 AT1G15750 AT1G19270 AT1G23550 AT1G24450 AT1G27320 AT1G29460 AT1G31770 AT1G34320 AT1G55325 AT1G58250 AT1G61390 AT1G63700 AT1G65790 AT1G68360…
8.04e-10	207	1993	System development	AT1G28520 AT1G65580 AT1G67260 AT2G30370 AT2G45190 AT2G48120 AT3G15510 AT3G63010 AT5G19620 AT5G24860 AT5G27320 AT5G13790 AT1G05010 AT2G27230 AT2G32700 AT2G35230 AT2G43410 AT3G57230 AT4G02020 AT4G15415 AT4G16280 AT4G22140 AT4G32551 AT5G08230 AT5G14530 AT5G20320 AT5G27230 AT5G37055 AT5G45600 AT5G60410 AT5G61380 AT5G61850 AT1G14440 AT1G17020 AT1G73680 AT2G22900 AT3G56400 AT5G11520 AT5G41700 AT5G51640…
1.28e-09	193	1832	Response to hormone	AT1G05010 AT1G12580 AT1G19180 AT1G50420 AT1G65580 AT1G68360 AT1G74950 AT2G21490 AT2G38310 AT2G38910 AT3G16350 AT3G63010 AT4G08850 AT4G30850 AT4G32570 AT4G32870 AT4G39400 AT5G27320 AT5G39340 AT5G52920 AT5G53160 AT1G07890 AT1G11910 AT1G16350 AT1G17840 AT1G20510 AT1G51980 AT2G36690 AT2G37170 AT3G15360 AT3G16640 AT3G22890 AT3G25230 AT3G48990 AT3G53180 AT3G56850 AT4G08390 AT4G09650 AT4G15910 AT4G20260…
1.98e-09	70	455	Defense response to bacterium	AT2G37710 AT3G53810 AT4G23180 AT4G23220 AT4G25030 AT4G29050 AT5G06740 AT5G10530 AT1G27320 AT2G46370 AT1G08830 AT1G80840 AT2G30860 AT2G37660 AT2G47730 AT3G16640 AT4G03280 AT4G09650 AT4G20260 AT4G31550 AT5G56980 AT1G28520 AT4G33300 AT5G37055 AT1G02120 AT1G02205 AT1G02450 AT1G02860 AT1G08450 AT1G09770 AT1G19180 AT1G19670 AT1G24100 AT1G26190 AT1G31770 AT1G66340 AT1G69170 AT1G77920 AT1G80600 AT2G05940…
2.24e-09	195	1870	Response to endogenous stimulus	AT1G05010 AT1G12580 AT1G19180 AT1G50420 AT1G65580 AT1G68360 AT1G74950 AT2G21490 AT2G38310 AT2G38910 AT3G16350 AT3G63010 AT4G08850 AT4G30850 AT4G32570 AT4G32870 AT4G39400 AT5G27320 AT5G39340 AT5G52920 AT5G53160 AT1G07890 AT1G11910 AT1G16350 AT1G17840 AT1G20510 AT1G51980 AT2G36690 AT2G37170 AT3G15360 AT3G16640 AT3G22890 AT3G25230 AT3G48990 AT3G53180 AT3G56850 AT4G08390 AT4G09650 AT4G15910 AT4G20260…
2.25e-09	65	409	Response to water	AT2G21490 AT4G35090 AT1G05680 AT1G15520 AT1G27320 AT1G54100 AT1G68010 AT1G78080 AT1G78380 AT2G17840 AT2G18050 AT2G32700 AT2G37170 AT2G37770 AT2G38470 AT2G41870 AT2G46680 AT3G10550 AT3G23920 AT3G24140 AT3G24500 AT3G57540 AT3G62770 AT4G02280 AT4G04330 AT4G15910 AT4G17410 AT4G20260 AT4G32551 AT4G34000 AT4G37790 AT5G13330 AT5G20510 AT5G40010 AT5G58070 AT5G59320 AT1G06770 AT1G28520 AT5G14420 AT5G66880…
2.25e-09	316	3419	Developmental process	AT1G05010 AT1G09540 AT1G21150 AT1G28520 AT1G65580 AT1G67260 AT1G68360 AT1G75540 AT2G21630 AT2G30370 AT2G45190 AT2G48120 AT3G13540 AT3G15510 AT3G17609 AT3G24140 AT3G28470 AT3G50660 AT3G63010 AT4G09460 AT4G29460 AT4G38620 AT5G11260 AT5G14400 AT5G14750 AT5G15680 AT5G19620 AT5G24860 AT5G27320 AT5G36110 AT5G53400 AT5G62470 AT3G12160 AT5G13790 AT1G05570 AT1G07090 AT1G15750 AT1G19270 AT1G23550 AT1G24450…
3.37e-09	259	2688	Regulation of nucleobase-containing compound metabolic process	AT1G07350 AT1G07530 AT1G08390 AT1G08970 AT1G12855 AT1G14440 AT1G15750 AT1G16710 AT1G21450 AT1G24290 AT1G25580 AT1G28470 AT1G28520 AT1G30480 AT1G35660 AT1G50420 AT1G50600 AT1G51060 AT1G55325 AT1G67310 AT1G68320 AT1G69600 AT1G75390 AT1G75510 AT1G75540 AT1G77300 AT1G80490 AT2G03510 AT2G17410 AT2G18050 AT2G18350 AT2G19930 AT2G26150 AT2G26430 AT2G27230 AT2G40340 AT2G40950 AT2G41690 AT2G46270 AT2G46680…
4.42e-09	259	2696	RNA biosynthetic process	AT1G03280 AT1G07090 AT1G07530 AT1G08970 AT1G12855 AT1G14440 AT1G15750 AT1G16710 AT1G21450 AT1G25580 AT1G28470 AT1G28520 AT1G35660 AT1G50420 AT1G50600 AT1G51060 AT1G55325 AT1G67310 AT1G68320 AT1G69200 AT1G69600 AT1G75390 AT1G75510 AT1G75540 AT1G77300 AT1G80490 AT2G03510 AT2G17410 AT2G18050 AT2G18350 AT2G19930 AT2G24120 AT2G26150 AT2G26430 AT2G27230 AT2G31160 AT2G34750 AT2G40340 AT2G40950 AT2G41690…

## Sheet: enrichment temprtr 34dwn
ShinyGO analysis of enrichment. Genes significantly downregulated at 34C relative to 22C.
Enrichment FDR	Genes in list	Total genes	Functional Category	Genes
6.69e-18	391	2378	Response to abiotic stimulus	AT1G03220 AT1G07400 AT1G09070 AT1G30040 AT1G53840 AT1G77120 AT2G25735 AT2G26660 AT3G02040 AT3G07350 AT3G08720 AT3G43190 AT3G50440 AT3G56400 AT4G01250 AT4G24570 AT4G26270 AT4G27450 AT4G27460 AT4G30380 AT4G30440 AT5G20230 AT5G20250 AT5G20790 AT5G42200 AT5G47060 AT5G64260 AT1G07090 AT1G15820 AT1G20440 AT1G29930 AT1G46264 AT1G61520 AT1G76570 AT2G01940 AT2G05100 AT2G16600 AT2G16850 AT2G24540 AT2G34430…
8.41e-17	234	1241	Carbohydrate metabolic process	AT1G09610 AT1G09780 AT1G12900 AT1G16300 AT1G23870 AT1G26850 AT1G27440 AT1G31190 AT1G32440 AT1G42970 AT1G43670 AT1G47840 AT1G65290 AT1G70730 AT1G78060 AT1G78580 AT1G79550 AT2G01140 AT2G03220 AT2G03480 AT2G19860 AT2G20680 AT2G21170 AT2G28100 AT2G28110 AT2G36390 AT2G36530 AT2G37090 AT2G37680 AT2G43980 AT2G44350 AT2G45790 AT3G01850 AT3G02870 AT3G04120 AT3G12780 AT3G18660 AT3G29320 AT3G46440 AT3G46970…
8.76e-14	312	1906	Small molecule metabolic process	AT1G06550 AT1G09620 AT1G09795 AT1G10030 AT1G10670 AT1G11840 AT1G11860 AT1G12350 AT1G12900 AT1G16300 AT1G17745 AT1G18640 AT1G22940 AT1G30040 AT1G30110 AT1G30520 AT1G31190 AT1G32440 AT1G32780 AT1G42970 AT1G43670 AT1G47840 AT1G59900 AT1G64660 AT1G65930 AT1G67280 AT1G70730 AT1G77120 AT1G77760 AT1G78570 AT1G79550 AT1G79750 AT1G80050 AT1G80230 AT2G01140 AT2G02010 AT2G13360 AT2G13560 AT2G16370 AT2G19860…
3.56e-13	78	283	Photosynthesis	AT1G15820 AT1G29930 AT1G61520 AT1G76570 AT2G05100 AT2G05620 AT2G34430 AT2G40100 AT3G08940 AT3G47470 AT3G54890 AT3G61470 AT4G05180 AT4G10340 AT5G48790 AT5G54270 AT1G08380 AT1G54500 AT1G55480 AT2G46820 AT1G03130 AT1G06680 AT1G08520 AT1G12900 AT1G16720 AT1G18730 AT1G20020 AT1G30380 AT1G31330 AT1G42970 AT1G44575 AT1G52230 AT1G67090 AT1G68750 AT1G74470 AT1G77090 AT1G79040 AT2G06520 AT2G20260 AT2G21170…
1.51e-11	142	715	Cell cycle	AT1G02730 AT1G03780 AT1G04820 AT1G18550 AT1G20610 AT1G44110 AT1G44900 AT1G47570 AT1G47870 AT1G49890 AT1G50490 AT1G61000 AT1G64350 AT1G70210 AT1G75780 AT1G76310 AT1G79890 AT1G80370 AT2G07690 AT2G16440 AT2G24490 AT2G26760 AT2G27970 AT2G28870 AT2G31270 AT2G32590 AT2G38620 AT3G01330 AT3G02820 AT3G05330 AT3G11520 AT3G20898 AT3G22930 AT3G23890 AT3G25100 AT3G25980 AT3G47690 AT3G48150 AT3G48160 AT3G50000…
2.06e-11	113	524	Polysaccharide metabolic process	AT1G09610 AT1G26850 AT1G27440 AT1G70730 AT1G78060 AT2G03220 AT2G03480 AT2G20680 AT2G28110 AT2G36390 AT2G37090 AT3G18660 AT3G29320 AT3G46970 AT4G00750 AT4G18780 AT4G19120 AT4G23990 AT4G32410 AT4G34260 AT5G01930 AT5G03650 AT5G05170 AT5G07720 AT5G15630 AT5G17310 AT5G17420 AT5G44030 AT5G46340 AT5G47500 AT5G51820 AT5G60920 AT5G62220 AT5G64570 AT5G64740 AT5G66460 AT5G67210 AT5G67230 AT1G68560 AT2G33570…
3.02e-11	118	561	Generation of precursor metabolites and energy	AT1G15820 AT1G16300 AT1G16700 AT1G29930 AT1G32440 AT1G47840 AT1G61520 AT1G70730 AT1G76570 AT1G79550 AT1G80230 AT2G01140 AT2G05100 AT2G05620 AT2G19860 AT2G21170 AT2G34430 AT2G36530 AT2G40100 AT2G44350 AT2G45290 AT3G01850 AT3G04120 AT3G08940 AT3G12780 AT3G20790 AT3G29320 AT3G46970 AT3G47470 AT3G52990 AT3G54890 AT3G55440 AT3G61470 AT4G05180 AT4G10040 AT4G10340 AT4G35260 AT4G37830 AT4G38970 AT5G08740…
1.14e-10	90	390	Carbohydrate biosynthetic process	AT1G09610 AT1G23870 AT1G27440 AT1G43670 AT1G65290 AT1G70730 AT1G78580 AT1G79550 AT2G03220 AT2G21170 AT2G28110 AT2G37090 AT2G37680 AT3G12780 AT3G18660 AT3G54050 AT3G55440 AT3G57520 AT4G18780 AT4G23990 AT4G32410 AT4G37870 AT5G05170 AT5G07720 AT5G15630 AT5G17420 AT5G20250 AT5G42740 AT5G44030 AT5G46340 AT5G51460 AT5G51820 AT5G60920 AT5G62220 AT5G64740 AT5G67210 AT5G67230 AT2G33570 AT3G55990 AT3G61130…
1.2e-10	147	774	Cell wall organization or biogenesis	AT1G02730 AT1G09610 AT1G14160 AT1G26850 AT1G27440 AT1G78060 AT2G03220 AT2G03480 AT2G04780 AT2G20680 AT2G28110 AT2G37090 AT3G02230 AT3G08900 AT3G18660 AT3G62060 AT4G00750 AT4G18780 AT4G19120 AT4G19410 AT4G23990 AT4G32410 AT4G34260 AT5G01930 AT5G03170 AT5G05170 AT5G07720 AT5G15630 AT5G17420 AT5G23870 AT5G44030 AT5G46340 AT5G60920 AT5G62220 AT5G64570 AT5G64740 AT5G66460 AT5G67210 AT5G67230 AT1G68560…
2.05e-10	477	3397	Response to chemical	AT1G03220 AT1G07400 AT1G09070 AT1G30040 AT1G53840 AT1G77120 AT2G25735 AT2G26660 AT3G02040 AT3G07350 AT3G08720 AT3G43190 AT3G50440 AT3G56400 AT4G01250 AT4G24570 AT4G26270 AT4G27450 AT4G27460 AT4G30380 AT4G30440 AT5G20230 AT5G20250 AT5G20790 AT5G42200 AT5G47060 AT5G64260 AT1G08650 AT1G12110 AT1G15170 AT1G17280 AT1G20440 AT1G23730 AT1G32440 AT1G32780 AT1G45000 AT1G47530 AT1G50670 AT1G67030 AT1G73590…
2.22e-10	172	962	Ion transport	AT1G06470 AT1G07030 AT1G09575 AT1G14360 AT1G47670 AT1G55730 AT1G64150 AT1G64720 AT1G64780 AT1G70300 AT1G72700 AT1G77690 AT1G80230 AT1G80510 AT2G03620 AT2G21050 AT2G23790 AT2G33040 AT2G38120 AT2G40540 AT2G41190 AT2G43950 AT3G05030 AT3G10600 AT3G27170 AT3G29060 AT3G51860 AT3G53720 AT3G55740 AT3G58810 AT3G62270 AT4G01840 AT4G13800 AT4G24570 AT4G29480 AT4G30190 AT4G32060 AT5G04930 AT5G17850 AT5G17860…
4.12e-10	79	332	Cellular polysaccharide metabolic process	AT1G09610 AT1G27440 AT1G70730 AT1G78060 AT2G03220 AT2G20680 AT2G28110 AT2G36390 AT2G37090 AT3G18660 AT3G29320 AT3G46970 AT4G18780 AT4G23990 AT4G32410 AT4G34260 AT5G01930 AT5G03650 AT5G05170 AT5G07720 AT5G15630 AT5G17310 AT5G17420 AT5G44030 AT5G46340 AT5G51820 AT5G60920 AT5G62220 AT5G64570 AT5G64740 AT5G66460 AT5G67210 AT5G67230 AT1G68560 AT3G55990 AT3G61130 AT1G02730 AT1G12780 AT1G27680 AT1G54870…
6.36e-10	124	632	Ion transmembrane transport	AT1G06470 AT1G07030 AT1G09575 AT1G14360 AT1G47670 AT1G55730 AT1G64150 AT1G64780 AT1G77690 AT1G80230 AT1G80510 AT2G21050 AT2G23790 AT2G33040 AT2G38120 AT2G41190 AT3G05030 AT3G27170 AT3G51860 AT3G55740 AT3G58810 AT4G01840 AT4G24570 AT4G29480 AT4G30190 AT4G32060 AT5G20090 AT5G23810 AT5G36290 AT5G46800 AT5G47030 AT5G49630 AT5G55630 AT5G59520 ATCG00120 ATCG00140 ATCG00470 AT1G15960 AT1G61800 AT2G28315…
7.12e-10	106	511	Cell cycle process	AT1G02730 AT1G03780 AT1G18550 AT1G20610 AT1G44110 AT1G44900 AT1G47570 AT1G49890 AT1G50490 AT1G61000 AT1G64350 AT1G70210 AT1G76310 AT1G79890 AT1G80370 AT2G07690 AT2G16440 AT2G24490 AT2G26760 AT2G28870 AT2G31270 AT2G32590 AT2G38620 AT3G05330 AT3G11520 AT3G20898 AT3G22930 AT3G23890 AT3G25100 AT3G25980 AT3G47690 AT3G48150 AT3G57060 AT4G02060 AT4G14700 AT4G18780 AT4G21270 AT4G23990 AT4G32410 AT4G32830…
1.03e-09	145	786	Small molecule biosynthetic process	AT1G09795 AT1G10030 AT1G10670 AT1G18640 AT1G22940 AT1G30040 AT1G43670 AT1G64660 AT1G79550 AT2G13360 AT2G21170 AT2G21940 AT2G24300 AT2G37680 AT2G43360 AT2G43750 AT3G03630 AT3G06350 AT3G06470 AT3G07270 AT3G12780 AT3G25900 AT3G46940 AT3G54050 AT3G55360 AT3G55440 AT3G61440 AT4G13720 AT4G13930 AT4G14880 AT4G23660 AT4G25420 AT4G36480 AT4G37870 AT5G01410 AT5G04620 AT5G05980 AT5G08740 AT5G10480 AT5G10870…
1.2e-09	144	781	Response to light stimulus	AT1G07090 AT1G15820 AT1G29930 AT1G30040 AT1G61520 AT1G76570 AT2G05100 AT2G16600 AT2G24540 AT2G34430 AT2G40100 AT2G42610 AT3G08940 AT3G47470 AT3G54890 AT3G61470 AT4G10340 AT4G25420 AT4G38960 AT5G54270 AT1G08650 AT1G10120 AT1G62400 AT3G04530 AT5G43630 AT1G29300 AT1G69935 AT2G05620 AT2G30520 AT2G47700 AT3G13480 AT3G52740 AT4G02440 AT4G16780 AT4G35090 AT5G58960 AT1G01120 AT1G01470 AT1G08540 AT1G16880…
1.72e-09	147	807	Response to radiation	AT1G07090 AT1G15820 AT1G29930 AT1G30040 AT1G61520 AT1G76570 AT2G05100 AT2G16600 AT2G24540 AT2G34430 AT2G40100 AT2G42610 AT3G08940 AT3G47470 AT3G54890 AT3G61470 AT4G10340 AT4G25420 AT4G38960 AT5G54270 AT5G63690 AT1G08650 AT1G10120 AT1G62400 AT3G04530 AT5G43630 AT1G29300 AT1G69935 AT2G05620 AT2G30520 AT2G47700 AT3G13480 AT3G52740 AT4G02440 AT4G16780 AT4G35090 AT5G58960 AT1G01120 AT1G01470 AT1G08540…
6.79e-09	104	518	Cellular carbohydrate metabolic process	AT1G09610 AT1G09780 AT1G23870 AT1G27440 AT1G31190 AT1G43670 AT1G70730 AT1G78060 AT1G78580 AT2G03220 AT2G20680 AT2G21170 AT2G28110 AT2G36390 AT2G37090 AT2G37680 AT2G43980 AT3G01850 AT3G02870 AT3G18660 AT3G29320 AT3G46970 AT3G54050 AT3G55440 AT4G18780 AT4G23990 AT4G32410 AT4G34260 AT5G01930 AT5G03650 AT5G05170 AT5G07720 AT5G15630 AT5G17310 AT5G17420 AT5G44030 AT5G46340 AT5G51460 AT5G51820 AT5G60920…
1.04e-08	36	106	Phenylpropanoid biosynthetic process	AT4G33790 AT4G36220 AT4G37970 AT4G37980 AT4G37990 AT1G15950 AT1G32100 AT3G24503 AT4G23690 AT4G31940 AT1G67980 AT2G36880 AT2G37040 AT3G53260 AT4G34050 AT4G39330 AT5G54160 AT2G38080 AT4G12350 AT5G03260 AT5G60020 AT1G04220 AT1G17840 AT1G61810 AT2G40890 AT3G55580 AT3G59030 AT4G22880 AT5G05340 AT5G05980 AT5G20230 AT5G41040 AT5G48930 AT5G49660 AT5G66390 AT1G22640
2.63e-08	213	1341	Transmembrane transport	AT1G02520 AT1G06470 AT1G07030 AT1G09575 AT1G14360 AT1G15170 AT1G15520 AT1G17840 AT1G27940 AT1G47530 AT1G47670 AT1G54730 AT1G55730 AT1G64150 AT1G64780 AT1G71960 AT1G77690 AT1G80230 AT1G80510 AT2G13610 AT2G21050 AT2G23790 AT2G26910 AT2G28900 AT2G33040 AT2G36910 AT2G38120 AT2G41190 AT3G03620 AT3G05030 AT3G18830 AT3G20460 AT3G21090 AT3G21690 AT3G26590 AT3G27170 AT3G51860 AT3G55740 AT3G58810 AT3G59030…
2.95e-08	107	553	Cation transport	AT1G07030 AT1G09575 AT1G55730 AT1G64150 AT1G64780 AT1G70300 AT1G80230 AT2G03620 AT2G23790 AT2G33040 AT2G40540 AT2G43950 AT3G05030 AT3G51860 AT3G53720 AT3G58810 AT4G01840 AT4G13800 AT4G29480 AT4G30190 AT4G32060 AT5G17850 AT5G17860 AT5G22830 AT5G36290 AT5G46800 AT5G47030 AT5G55630 AT5G59520 AT5G64560 ATCG00120 ATCG00140 ATCG00470 AT1G15960 AT3G02850 AT3G13050 AT3G15380 AT4G00630 AT4G22120 AT4G37640…
4.42e-08	61	253	Microtubule-based process	AT1G03780 AT1G04820 AT1G18550 AT1G26355 AT1G27920 AT1G49890 AT1G54510 AT1G59540 AT1G61000 AT1G69230 AT1G75780 AT2G21300 AT2G22610 AT2G36200 AT2G37420 AT2G47500 AT3G16060 AT3G17360 AT3G20150 AT3G22930 AT3G23670 AT3G25600 AT3G44050 AT3G47690 AT3G49650 AT3G50770 AT4G14330 AT4G15830 AT4G21270 AT4G32830 AT4G39050 AT5G02370 AT5G05970 AT5G12250 AT5G15510 AT5G17410 AT5G19780 AT5G23860 AT5G27000 AT5G47820…
5.49e-08	114	609	Cell wall organization	AT1G14160 AT1G26850 AT2G03480 AT3G62060 AT4G00750 AT4G19120 AT4G19410 AT5G15630 AT5G23870 AT5G60920 AT3G61130 AT1G02730 AT1G08200 AT1G12260 AT1G12780 AT1G13250 AT1G18580 AT1G19300 AT1G21310 AT1G23200 AT1G27440 AT1G43790 AT1G48100 AT1G53830 AT1G53840 AT1G62440 AT1G64390 AT1G68560 AT1G69530 AT1G70090 AT1G75680 AT1G78570 AT2G03090 AT2G03220 AT2G14620 AT2G18060 AT2G26440 AT2G28110 AT2G32990 AT2G33570…
1.14e-07	49	187	Monosaccharide metabolic process	AT1G12900 AT1G42970 AT1G43670 AT1G70730 AT1G79550 AT2G21170 AT2G28100 AT2G37680 AT2G45790 AT3G01850 AT3G12780 AT3G46440 AT3G54050 AT3G55440 AT3G62830 AT4G26850 AT4G37870 AT5G13980 AT5G42740 AT5G51820 AT5G61410 AT5G66150 AT2G47180 AT1G09780 AT1G12780 AT1G14020 AT1G16300 AT1G29200 AT1G38131 AT1G47840 AT1G51630 AT1G52630 AT2G19860 AT2G47140 AT3G04120 AT3G05320 AT4G24530 AT5G15740 AT5G28840 AT5G49650…
1.75e-07	438	3238	Anatomical structure development	AT1G04160 AT1G09560 AT1G53230 AT1G67030 AT1G75840 AT2G03060 AT2G16600 AT2G22540 AT2G32440 AT2G43750 AT2G44690 AT3G02310 AT3G02380 AT3G03990 AT3G13730 AT3G14940 AT3G22810 AT3G30180 AT3G46550 AT3G48040 AT3G54220 AT3G58780 AT3G62020 AT4G00850 AT4G18390 AT4G25420 AT4G27060 AT4G28250 AT4G34490 AT4G36380 AT4G37810 AT4G38960 AT5G05690 AT5G19040 AT5G23420 AT5G23530 AT5G28640 AT5G38970 AT5G45970 AT5G53550…
1.97e-07	23	55	Lignin biosynthetic process	AT4G36220 AT4G37970 AT4G37980 AT4G37990 AT1G15950 AT1G67980 AT2G36880 AT4G34050 AT4G39330 AT5G54160 AT2G38080 AT4G12350 AT5G03260 AT5G60020 AT1G61810 AT2G40890 AT3G55580 AT5G05340 AT5G05980 AT5G20230 AT5G48930 AT5G49660 AT5G66390
1.97e-07	167	1018	Response to inorganic substance	AT1G07400 AT1G12110 AT1G20440 AT2G16850 AT2G40300 AT3G12780 AT3G27170 AT3G54820 AT3G61430 AT4G00430 AT4G35090 AT4G35100 AT5G19640 AT5G50200 AT5G53550 AT5G60660 AT5G61910 AT1G62400 AT3G04120 AT4G14880 AT1G01470 AT1G52330 AT2G17420 AT2G41680 AT2G44060 AT3G18490 AT5G51100 AT1G01060 AT1G02820 AT1G04510 AT1G04580 AT1G07820 AT1G09340 AT1G09780 AT1G11840 AT1G11860 AT1G15520 AT1G21750 AT1G42970 AT1G51340…
1.97e-07	203	1298	Oxoacid metabolic process	AT1G06550 AT1G09620 AT1G09795 AT1G10670 AT1G11840 AT1G11860 AT1G16300 AT1G17745 AT1G18640 AT1G30040 AT1G30520 AT1G32440 AT1G47840 AT1G59900 AT1G64660 AT1G65930 AT1G67280 AT1G77760 AT1G79550 AT1G79750 AT2G01140 AT2G02010 AT2G13360 AT2G13560 AT2G19860 AT2G21170 AT2G21940 AT2G23620 AT2G24300 AT2G34770 AT2G36530 AT2G39020 AT2G43360 AT2G43750 AT2G44450 AT3G03630 AT3G04120 AT3G06350 AT3G06470 AT3G12780…
2.27e-07	203	1301	Organic acid metabolic process	AT1G06550 AT1G09620 AT1G09795 AT1G10670 AT1G11840 AT1G11860 AT1G16300 AT1G17745 AT1G18640 AT1G30040 AT1G30520 AT1G32440 AT1G47840 AT1G59900 AT1G64660 AT1G65930 AT1G67280 AT1G77760 AT1G79550 AT1G79750 AT2G01140 AT2G02010 AT2G13360 AT2G13560 AT2G19860 AT2G21170 AT2G21940 AT2G23620 AT2G24300 AT2G34770 AT2G36530 AT2G39020 AT2G43360 AT2G43750 AT2G44450 AT3G03630 AT3G04120 AT3G06350 AT3G06470 AT3G12780…
2.34e-07	181	1130	Carboxylic acid metabolic process	AT1G06550 AT1G09620 AT1G09795 AT1G10670 AT1G11840 AT1G11860 AT1G16300 AT1G17745 AT1G18640 AT1G30040 AT1G30520 AT1G32440 AT1G47840 AT1G59900 AT1G64660 AT1G65930 AT1G67280 AT1G79550 AT1G79750 AT2G01140 AT2G02010 AT2G13360 AT2G13560 AT2G19860 AT2G21170 AT2G21940 AT2G23620 AT2G24300 AT2G34770 AT2G36530 AT2G39020 AT2G43360 AT2G43750 AT3G03630 AT3G04120 AT3G06350 AT3G06470 AT3G12780 AT3G16170 AT3G25900…

## Sheet: enrichment LD up
ShinyGO analysis of enrichment. Genes significantly upregulated at LongDay relative to ShortDay photoperiods.
Enrichment FDR	Genes in list	Total genes	Functional Category	Genes
1.113e-37	961	4616	Gene expression	AT1G01260 AT1G02330 AT1G03280 AT1G04400 AT1G04640 AT1G05460 AT1G05830 AT1G07090 AT1G07170 AT1G07530 AT1G07830 AT1G07930 AT1G08360 AT1G08970 AT1G09230 AT1G09290 AT1G09620 AT1G09700 AT1G10490 AT1G11240 AT1G12855 AT1G13030 AT1G13120 AT1G13950 AT1G14740 AT1G14790 AT1G14900 AT1G15270 AT1G16280 AT1G16800 AT1G17760 AT1G18070 AT1G18540 AT1G19330 AT1G19485 AT1G20580 AT1G23280 AT1G25260 AT1G25350 AT1G25440…
3.32133e-26	533	2378	Response to abiotic stimulus	AT1G01720 AT1G03220 AT1G07400 AT1G19020 AT1G19530 AT1G23710 AT1G25560 AT1G27730 AT1G32928 AT1G61340 AT1G66880 AT1G67360 AT1G68620 AT1G74310 AT1G76640 AT1G76650 AT2G26150 AT2G26660 AT2G36460 AT2G40000 AT2G40140 AT2G41430 AT3G08720 AT3G15210 AT3G18290 AT3G23150 AT3G24500 AT3G50440 AT4G10250 AT4G19880 AT4G24570 AT4G26270 AT4G27450 AT4G27460 AT4G34150 AT5G12020 AT5G20790 AT5G24590 AT5G37670 AT5G42050…
3.09271e-25	429	1820	Response to oxygen-containing compound	AT1G01360 AT1G05010 AT1G07400 AT1G07530 AT1G08650 AT1G12580 AT1G12680 AT1G18100 AT1G20440 AT1G20950 AT1G23730 AT1G32780 AT1G35670 AT1G50420 AT1G53540 AT1G77490 AT2G01570 AT2G16850 AT2G19310 AT2G40140 AT2G40300 AT2G40330 AT2G41140 AT2G41370 AT2G46700 AT3G03450 AT3G04530 AT3G16350 AT3G17860 AT3G22960 AT3G29575 AT3G51850 AT3G52990 AT3G54820 AT3G63010 AT4G00430 AT4G10250 AT4G13930 AT4G24210 AT4G28910…
7.19464e-24	697	3397	Response to chemical	AT1G01720 AT1G03220 AT1G07400 AT1G19020 AT1G19530 AT1G23710 AT1G25560 AT1G27730 AT1G32928 AT1G61340 AT1G66880 AT1G67360 AT1G68620 AT1G74310 AT1G76640 AT1G76650 AT2G26150 AT2G26660 AT2G36460 AT2G40000 AT2G40140 AT2G41430 AT3G08720 AT3G15210 AT3G18290 AT3G23150 AT3G24500 AT3G50440 AT4G10250 AT4G19880 AT4G24570 AT4G26270 AT4G27450 AT4G27460 AT4G34150 AT5G12020 AT5G20790 AT5G24590 AT5G37670 AT5G42050…
1.04596e-21	850	4394	Cellular protein metabolic process	AT1G01360 AT1G02305 AT1G02560 AT1G04790 AT1G04860 AT1G05170 AT1G05350 AT1G05830 AT1G07710 AT1G07830 AT1G07930 AT1G07990 AT1G08360 AT1G08650 AT1G09620 AT1G10600 AT1G11050 AT1G11300 AT1G11750 AT1G12440 AT1G12580 AT1G12680 AT1G12820 AT1G13120 AT1G13950 AT1G15100 AT1G15270 AT1G15390 AT1G15740 AT1G16470 AT1G17280 AT1G18070 AT1G18540 AT1G20270 AT1G20540 AT1G20650 AT1G21270 AT1G21410 AT1G21770 AT1G23260…
1.2942e-21	919	4829	Protein metabolic process	AT1G01360 AT1G02305 AT1G02560 AT1G03220 AT1G04790 AT1G04860 AT1G05170 AT1G05350 AT1G05830 AT1G05840 AT1G07710 AT1G07830 AT1G07930 AT1G07990 AT1G08360 AT1G08650 AT1G09620 AT1G10600 AT1G11050 AT1G11300 AT1G11750 AT1G11910 AT1G12440 AT1G12580 AT1G12680 AT1G12820 AT1G13120 AT1G13950 AT1G15100 AT1G15270 AT1G15390 AT1G15740 AT1G16470 AT1G17280 AT1G18070 AT1G18540 AT1G20270 AT1G20540 AT1G20650 AT1G21270…
3.66089e-21	762	3874	Regulation of metabolic process	AT1G01230 AT1G01260 AT1G01360 AT1G02330 AT1G04400 AT1G05460 AT1G05830 AT1G07130 AT1G07530 AT1G07710 AT1G07990 AT1G08970 AT1G09700 AT1G12855 AT1G13120 AT1G13950 AT1G14740 AT1G14790 AT1G14900 AT1G19330 AT1G25260 AT1G25440 AT1G28520 AT1G30500 AT1G31760 AT1G32340 AT1G32640 AT1G43190 AT1G43850 AT1G48630 AT1G49180 AT1G50420 AT1G50600 AT1G51060 AT1G53570 AT1G53750 AT1G54140 AT1G54490 AT1G54610 AT1G54690…
3.66089e-21	802	4121	Cellular nitrogen compound biosynthetic process	AT1G01220 AT1G01230 AT1G01260 AT1G02880 AT1G03280 AT1G05830 AT1G07090 AT1G07130 AT1G07530 AT1G07780 AT1G07830 AT1G07930 AT1G08360 AT1G08970 AT1G09620 AT1G12350 AT1G12855 AT1G13120 AT1G13950 AT1G14790 AT1G14900 AT1G15270 AT1G18070 AT1G18540 AT1G19330 AT1G19485 AT1G23820 AT1G25220 AT1G25350 AT1G25440 AT1G27450 AT1G28520 AT1G28560 AT1G30500 AT1G30820 AT1G31760 AT1G32640 AT1G33140 AT1G36730 AT1G43190…
6.67235e-20	936	5000	Nucleobase-containing compound metabolic process	AT1G01220 AT1G01260 AT1G02330 AT1G03280 AT1G04640 AT1G05750 AT1G05830 AT1G07090 AT1G07130 AT1G07170 AT1G07530 AT1G08070 AT1G08360 AT1G08970 AT1G09230 AT1G09290 AT1G09620 AT1G09700 AT1G10490 AT1G11240 AT1G11800 AT1G12350 AT1G12855 AT1G13030 AT1G13410 AT1G14790 AT1G14900 AT1G16280 AT1G16800 AT1G17760 AT1G19330 AT1G19485 AT1G20580 AT1G23260 AT1G23280 AT1G25260 AT1G25350 AT1G25440 AT1G27450 AT1G28520…
8.20458e-20	786	4068	RNA metabolic process	AT1G01260 AT1G02330 AT1G03280 AT1G04640 AT1G05750 AT1G05830 AT1G07090 AT1G07170 AT1G07530 AT1G08070 AT1G08360 AT1G08970 AT1G09230 AT1G09290 AT1G09620 AT1G09700 AT1G10490 AT1G11240 AT1G12855 AT1G13030 AT1G13410 AT1G14790 AT1G14900 AT1G16280 AT1G16800 AT1G17760 AT1G19330 AT1G19485 AT1G20580 AT1G23280 AT1G25260 AT1G25350 AT1G25440 AT1G28520 AT1G28560 AT1G30500 AT1G31660 AT1G31760 AT1G31870 AT1G31920…
4.23036e-19	695	3533	Regulation of cellular metabolic process	AT1G01230 AT1G01260 AT1G01360 AT1G02330 AT1G05830 AT1G07130 AT1G07530 AT1G07710 AT1G07990 AT1G08970 AT1G12855 AT1G13120 AT1G13950 AT1G14790 AT1G14900 AT1G19330 AT1G25440 AT1G28520 AT1G30500 AT1G31760 AT1G32340 AT1G32640 AT1G43190 AT1G43850 AT1G48630 AT1G49180 AT1G50420 AT1G50600 AT1G51060 AT1G53570 AT1G53750 AT1G54140 AT1G54610 AT1G54690 AT1G55300 AT1G55325 AT1G56170 AT1G62990 AT1G67310 AT1G69510…
1.09815e-18	487	2303	Response to organic substance	AT1G01360 AT1G05010 AT1G07530 AT1G08450 AT1G08650 AT1G09210 AT1G12580 AT1G12680 AT1G17280 AT1G18100 AT1G20440 AT1G20950 AT1G23730 AT1G32780 AT1G35670 AT1G50420 AT1G50670 AT1G55610 AT1G70940 AT1G74310 AT2G01420 AT2G01570 AT2G01930 AT2G30050 AT2G40140 AT2G40300 AT2G40330 AT2G41140 AT2G41370 AT2G46700 AT3G03450 AT3G04530 AT3G12580 AT3G16350 AT3G16360 AT3G17860 AT3G21510 AT3G22810 AT3G22960 AT3G28910…
4.70538e-18	161	546	Ribonucleoprotein complex biogenesis	AT1G03530 AT1G04640 AT1G08360 AT1G10490 AT1G11240 AT1G13030 AT1G13160 AT1G14320 AT1G16280 AT1G18540 AT1G20580 AT1G23280 AT1G25260 AT1G26880 AT1G26910 AT1G31660 AT1G36730 AT1G42440 AT1G48830 AT1G60080 AT1G61580 AT1G63810 AT1G66510 AT1G72320 AT1G72370 AT1G74050 AT1G74270 AT1G77030 AT1G77680 AT1G78910 AT1G80070 AT1G80750 AT2G01250 AT2G09990 AT2G18220 AT2G18740 AT2G19385 AT2G34357 AT2G36620 AT2G37190…
8.05182e-18	614	3083	Regulation of gene expression	AT1G01260 AT1G02330 AT1G04400 AT1G05460 AT1G05830 AT1G07530 AT1G08970 AT1G09700 AT1G12855 AT1G13120 AT1G13950 AT1G14740 AT1G14790 AT1G14900 AT1G19330 AT1G25260 AT1G25440 AT1G28520 AT1G30500 AT1G31760 AT1G32640 AT1G43190 AT1G43850 AT1G48630 AT1G50420 AT1G50600 AT1G51060 AT1G53750 AT1G54140 AT1G54490 AT1G54610 AT1G54690 AT1G55300 AT1G55325 AT1G56170 AT1G60080 AT1G62990 AT1G67310 AT1G67580 AT1G69600…
2.46651e-17	788	4169	Cellular macromolecule biosynthetic process	AT1G01260 AT1G03280 AT1G05170 AT1G05830 AT1G07090 AT1G07130 AT1G07530 AT1G07830 AT1G07930 AT1G08360 AT1G08970 AT1G09620 AT1G12855 AT1G13120 AT1G13950 AT1G14790 AT1G14900 AT1G15270 AT1G16800 AT1G18070 AT1G18540 AT1G19330 AT1G19485 AT1G25350 AT1G25440 AT1G28520 AT1G28560 AT1G30500 AT1G31760 AT1G32640 AT1G33140 AT1G36730 AT1G43190 AT1G43850 AT1G48140 AT1G48630 AT1G50200 AT1G50420 AT1G50600 AT1G51060…
2.78765e-17	661	3387	Regulation of primary metabolic process	AT1G01230 AT1G01260 AT1G01360 AT1G02330 AT1G05830 AT1G07130 AT1G07530 AT1G07710 AT1G07990 AT1G08970 AT1G12855 AT1G13120 AT1G13950 AT1G14790 AT1G14900 AT1G19330 AT1G25440 AT1G28520 AT1G30500 AT1G31760 AT1G32340 AT1G32640 AT1G43190 AT1G43850 AT1G48630 AT1G50420 AT1G50600 AT1G51060 AT1G53570 AT1G53750 AT1G54140 AT1G54610 AT1G54690 AT1G55300 AT1G55325 AT1G56170 AT1G62990 AT1G67310 AT1G69510 AT1G69600…
5.4418e-17	800	4258	Macromolecule biosynthetic process	AT1G01230 AT1G01260 AT1G03280 AT1G05170 AT1G05830 AT1G07090 AT1G07130 AT1G07530 AT1G07830 AT1G07930 AT1G08360 AT1G08970 AT1G09620 AT1G12855 AT1G13120 AT1G13950 AT1G14790 AT1G14900 AT1G15270 AT1G16800 AT1G18070 AT1G18540 AT1G19330 AT1G19485 AT1G25350 AT1G25440 AT1G28520 AT1G28560 AT1G30500 AT1G31760 AT1G32640 AT1G33140 AT1G36730 AT1G43190 AT1G43850 AT1G48140 AT1G48630 AT1G50200 AT1G50420 AT1G50600…
1.19375e-16	646	3317	Regulation of nitrogen compound metabolic process	AT1G01230 AT1G01260 AT1G01360 AT1G02330 AT1G05830 AT1G07130 AT1G07530 AT1G07710 AT1G07990 AT1G08970 AT1G12855 AT1G13120 AT1G13950 AT1G14790 AT1G14900 AT1G19330 AT1G25440 AT1G28520 AT1G30500 AT1G31760 AT1G32340 AT1G32640 AT1G43190 AT1G43850 AT1G48630 AT1G50420 AT1G50600 AT1G51060 AT1G53570 AT1G53750 AT1G54140 AT1G54610 AT1G54690 AT1G55300 AT1G55325 AT1G56170 AT1G62990 AT1G67310 AT1G69510 AT1G69600…
1.94807e-16	579	2917	Regulation of biosynthetic process	AT1G01230 AT1G01260 AT1G05830 AT1G07130 AT1G07530 AT1G08970 AT1G12855 AT1G13120 AT1G13950 AT1G14790 AT1G14900 AT1G19330 AT1G25440 AT1G28520 AT1G30500 AT1G31760 AT1G32640 AT1G43190 AT1G43850 AT1G48630 AT1G50420 AT1G50600 AT1G51060 AT1G53750 AT1G54140 AT1G54610 AT1G54690 AT1G55300 AT1G55325 AT1G56170 AT1G62990 AT1G67310 AT1G69600 AT1G69780 AT1G70060 AT1G70070 AT1G72830 AT1G75060 AT1G75540 AT1G76560…
2.21655e-16	692	3610	Regulation of macromolecule metabolic process	AT1G01230 AT1G01260 AT1G01360 AT1G02330 AT1G04400 AT1G05460 AT1G05830 AT1G07130 AT1G07530 AT1G07710 AT1G07990 AT1G08970 AT1G09700 AT1G12855 AT1G13120 AT1G13950 AT1G14740 AT1G14790 AT1G14900 AT1G19330 AT1G25260 AT1G25440 AT1G28520 AT1G30500 AT1G31760 AT1G32340 AT1G32640 AT1G43190 AT1G43850 AT1G48630 AT1G50420 AT1G50600 AT1G51060 AT1G53570 AT1G53750 AT1G54140 AT1G54490 AT1G54610 AT1G54690 AT1G55300…
3.8398e-16	573	2891	Regulation of cellular biosynthetic process	AT1G01230 AT1G01260 AT1G05830 AT1G07130 AT1G07530 AT1G08970 AT1G12855 AT1G13120 AT1G13950 AT1G14790 AT1G14900 AT1G19330 AT1G25440 AT1G28520 AT1G30500 AT1G31760 AT1G32640 AT1G43190 AT1G43850 AT1G48630 AT1G50420 AT1G50600 AT1G51060 AT1G53750 AT1G54140 AT1G54610 AT1G54690 AT1G55300 AT1G55325 AT1G56170 AT1G62990 AT1G67310 AT1G69600 AT1G69780 AT1G70060 AT1G70070 AT1G72830 AT1G75060 AT1G75540 AT1G76710…
5.43308e-16	848	4601	Nucleic acid metabolic process	AT1G01260 AT1G02330 AT1G03280 AT1G04640 AT1G05750 AT1G05830 AT1G07090 AT1G07130 AT1G07170 AT1G07530 AT1G08070 AT1G08360 AT1G08970 AT1G09230 AT1G09290 AT1G09620 AT1G09700 AT1G10490 AT1G11240 AT1G11800 AT1G12855 AT1G13030 AT1G13410 AT1G14790 AT1G14900 AT1G16280 AT1G16800 AT1G17760 AT1G19330 AT1G19485 AT1G20580 AT1G23260 AT1G23280 AT1G25260 AT1G25350 AT1G25440 AT1G28520 AT1G28560 AT1G30500 AT1G31660…
8.9093e-16	565	2855	Multicellular organism development	AT1G05010 AT1G14740 AT1G18100 AT1G25350 AT1G28520 AT1G43850 AT1G75540 AT1G79560 AT2G01570 AT2G03060 AT2G20120 AT2G22540 AT2G31380 AT2G42620 AT2G45190 AT2G45660 AT2G48120 AT3G02150 AT3G02310 AT3G02380 AT3G03450 AT3G18550 AT3G22810 AT3G54220 AT3G55920 AT3G58780 AT3G62020 AT3G63010 AT4G00850 AT4G18390 AT4G22950 AT4G24120 AT5G03740 AT5G05690 AT5G23420 AT5G24690 AT5G24930 AT5G38970 AT5G43900 AT5G49150…
1.16229e-15	246	1018	Response to inorganic substance	AT1G05010 AT1G07400 AT1G20440 AT1G53540 AT2G16850 AT2G19310 AT2G40300 AT3G12780 AT3G54820 AT4G00430 AT4G10250 AT4G24120 AT4G35090 AT5G12020 AT5G37670 AT5G50200 AT5G61910 AT1G62400 AT2G39450 AT2G43790 AT3G04120 AT4G09320 AT4G14880 AT4G20260 AT1G77180 AT2G44060 AT5G46180 AT5G51100 AT1G02130 AT1G02820 AT1G04410 AT1G05680 AT1G05690 AT1G07660 AT1G07820 AT1G07930 AT1G09780 AT1G12820 AT1G15520 AT1G16470…
2.0822e-15	397	1870	Response to endogenous stimulus	AT1G01360 AT1G05010 AT1G08650 AT1G12580 AT1G12680 AT1G18100 AT1G20440 AT1G35670 AT1G50420 AT1G55610 AT1G70940 AT2G01420 AT2G01570 AT2G01930 AT2G40300 AT2G40330 AT2G41140 AT2G41370 AT2G46700 AT3G03450 AT3G04530 AT3G16350 AT3G16360 AT3G17860 AT3G21510 AT3G22810 AT3G22960 AT3G28910 AT3G29575 AT3G51850 AT3G52990 AT3G63010 AT4G08850 AT4G13930 AT4G24210 AT4G28910 AT4G30610 AT4G30850 AT4G32870 AT4G39400…
2.52707e-15	390	1832	Response to hormone	AT1G01360 AT1G05010 AT1G08650 AT1G12580 AT1G12680 AT1G18100 AT1G20440 AT1G35670 AT1G50420 AT1G55610 AT1G70940 AT2G01420 AT2G01570 AT2G01930 AT2G40300 AT2G40330 AT2G41140 AT2G41370 AT2G46700 AT3G03450 AT3G04530 AT3G16350 AT3G16360 AT3G17860 AT3G21510 AT3G22810 AT3G22960 AT3G28910 AT3G29575 AT3G51850 AT3G52990 AT3G63010 AT4G08850 AT4G24210 AT4G28910 AT4G30610 AT4G30850 AT4G32870 AT4G39400 AT5G04870…
3.29474e-15	552	2796	Regulation of macromolecule biosynthetic process	AT1G01230 AT1G01260 AT1G05830 AT1G07130 AT1G07530 AT1G08970 AT1G12855 AT1G13120 AT1G13950 AT1G14790 AT1G14900 AT1G19330 AT1G25440 AT1G28520 AT1G30500 AT1G31760 AT1G32640 AT1G43190 AT1G43850 AT1G48630 AT1G50420 AT1G50600 AT1G51060 AT1G53750 AT1G54140 AT1G54610 AT1G54690 AT1G55300 AT1G55325 AT1G56170 AT1G62990 AT1G67310 AT1G69600 AT1G69780 AT1G70060 AT1G70070 AT1G72830 AT1G75060 AT1G75540 AT1G76710…
3.93097e-15	624	3238	Anatomical structure development	AT1G05010 AT1G14740 AT1G18100 AT1G25350 AT1G28520 AT1G43850 AT1G71790 AT1G75540 AT1G79560 AT2G01570 AT2G03060 AT2G17800 AT2G20120 AT2G22540 AT2G31380 AT2G35110 AT2G42620 AT2G45190 AT2G45660 AT2G48120 AT3G02050 AT3G02150 AT3G02310 AT3G02380 AT3G03450 AT3G17210 AT3G18550 AT3G22810 AT3G48040 AT3G54220 AT3G55920 AT3G58780 AT3G62020 AT3G63010 AT4G00850 AT4G02980 AT4G18390 AT4G22950 AT4G24120 AT4G39690…
4.47184e-15	653	3419	Developmental process	AT1G05010 AT1G14740 AT1G18100 AT1G22640 AT1G25350 AT1G28520 AT1G43850 AT1G71790 AT1G74120 AT1G75540 AT1G79560 AT2G01570 AT2G03060 AT2G17800 AT2G20120 AT2G21710 AT2G22540 AT2G31380 AT2G35110 AT2G42620 AT2G44020 AT2G45190 AT2G45660 AT2G46410 AT2G48120 AT3G02050 AT3G02150 AT3G02310 AT3G02380 AT3G03450 AT3G13540 AT3G17210 AT3G18550 AT3G22810 AT3G23250 AT3G24050 AT3G28910 AT3G48040 AT3G54220 AT3G55920…
7.75988e-15	532	2688	Regulation of nucleobase-containing compound metabolic process	AT1G01260 AT1G02330 AT1G05830 AT1G07130 AT1G07530 AT1G08970 AT1G12855 AT1G14790 AT1G14900 AT1G19330 AT1G25440 AT1G28520 AT1G30500 AT1G31760 AT1G32640 AT1G43190 AT1G43850 AT1G50420 AT1G50600 AT1G51060 AT1G53750 AT1G54140 AT1G54610 AT1G54690 AT1G55300 AT1G55325 AT1G56170 AT1G62990 AT1G67310 AT1G69600 AT1G69780 AT1G70060 AT1G72830 AT1G75060 AT1G75540 AT1G76710 AT1G79000 AT1G80490 AT2G01570 AT2G01930…

## Sheet: enrichment LD dwn
ShinyGO analysis of enrichment. Genes significantly downregulated at LongDay relative to ShortDay photoperiods.
Enrichment FDR	Genes in list	Total genes	Functional Category	Genes
5.23133e-19	77	390	RNA modification	AT1G03510 AT1G04840 AT1G09410 AT1G11290 AT1G11430 AT1G18485 AT1G25360 AT1G26900 AT1G31430 AT1G32415 AT1G33350 AT1G56690 AT1G74630 AT1G75200 AT1G78190 AT1G78910 AT2G13600 AT2G27610 AT2G29760 AT2G33760 AT2G36730 AT2G41080 AT2G44880 AT3G02010 AT3G09040 AT3G11460 AT3G12770 AT3G14330 AT3G14730 AT3G15000 AT3G18840 AT3G20930 AT3G22150 AT3G23330 AT3G26782 AT3G28660 AT3G29230 AT3G47530 AT3G49710 AT3G57150…
4.57762e-17	201	1854	Organonitrogen compound biosynthetic process	AT1G02205 AT1G07930 AT1G07940 AT1G09430 AT1G09810 AT1G11790 AT1G13950 AT1G14290 AT1G15870 AT1G18070 AT1G18080 AT1G18640 AT1G25350 AT1G29880 AT1G31220 AT1G36370 AT1G45332 AT1G55090 AT1G69740 AT1G72370 AT1G74050 AT1G74270 AT1G74470 AT1G75200 AT2G05830 AT2G18250 AT2G21940 AT2G29690 AT2G32070 AT2G33040 AT2G37190 AT3G01800 AT3G05560 AT3G06470 AT3G10050 AT3G12670 AT3G12930 AT3G16810 AT3G17040 AT3G18680…
9.99127e-13	102	781	Response to light stimulus	AT1G06040 AT1G07090 AT1G15820 AT1G22770 AT1G29930 AT1G61520 AT1G68050 AT1G78440 AT1G78600 AT2G05100 AT2G34430 AT3G08940 AT3G15620 AT3G17609 AT3G47470 AT3G54890 AT3G61470 AT4G10340 AT4G25420 AT5G08640 AT5G11260 AT5G54270 AT5G58760 AT1G08650 AT1G73805 AT2G46340 AT3G46610 AT4G13670 AT1G14280 AT1G29300 AT1G53380 AT2G05620 AT2G16365 AT2G40080 AT3G44450 AT3G60680 AT4G35090 AT1G14920 AT1G42970 AT1G43560…
9.99127e-13	225	2378	Response to abiotic stimulus	AT1G09070 AT1G13360 AT3G43190 AT3G56400 AT4G11660 AT5G20790 AT5G57560 AT1G06040 AT1G07090 AT1G14920 AT1G15820 AT1G22770 AT1G29930 AT1G61520 AT1G67970 AT1G68050 AT1G78440 AT1G78600 AT2G05100 AT2G34430 AT3G08940 AT3G15620 AT3G17609 AT3G22830 AT3G47470 AT3G50980 AT3G54890 AT3G60130 AT3G61470 AT4G10340 AT4G21200 AT4G21870 AT4G25420 AT4G36990 AT5G02500 AT5G03720 AT5G08640 AT5G09590 AT5G11260 AT5G15450…
2.1542e-12	103	807	Response to radiation	AT1G06040 AT1G07090 AT1G15820 AT1G22770 AT1G29930 AT1G61520 AT1G68050 AT1G78440 AT1G78600 AT2G05100 AT2G34430 AT3G08940 AT3G15620 AT3G17609 AT3G47470 AT3G54890 AT3G61470 AT4G10340 AT4G25420 AT5G08640 AT5G11260 AT5G54270 AT5G58760 AT1G08650 AT1G73805 AT2G46340 AT3G46610 AT4G13670 AT1G14280 AT1G29300 AT1G53380 AT2G05620 AT2G16365 AT2G40080 AT3G44450 AT3G60680 AT4G35090 AT1G14920 AT1G42970 AT1G43560…
1.10361e-10	54	317	Plastid organization	AT1G21150 AT1G24490 AT1G52080 AT1G56200 AT1G64810 AT1G69200 AT2G03050 AT2G26570 AT3G06730 AT3G18870 AT3G25690 AT3G54090 AT3G56290 AT5G07900 AT5G42270 AT5G55280 AT5G64950 AT2G30950 AT4G20360 AT1G04770 AT1G44575 AT1G49510 AT1G63680 AT1G71720 AT1G78600 AT2G01110 AT2G16365 AT2G26840 AT2G31270 AT2G34860 AT2G46340 AT3G07700 AT3G17040 AT3G18420 AT3G19220 AT3G46610 AT3G47520 AT4G10620 AT4G13200 AT4G13670…
4.05487e-10	56	349	Response to cadmium ion	AT4G14880 AT4G35090 AT1G01060 AT1G07590 AT1G07930 AT1G07940 AT1G18080 AT1G29880 AT1G36370 AT1G42970 AT1G49010 AT1G53240 AT1G60710 AT1G65930 AT1G68560 AT1G70170 AT1G78380 AT2G21660 AT2G23350 AT2G36530 AT2G39920 AT2G47470 AT3G01860 AT3G04120 AT3G08590 AT3G12670 AT3G13860 AT3G19170 AT3G23990 AT3G46970 AT3G48000 AT3G52880 AT3G55440 AT3G56070 AT3G58610 AT3G60190 AT4G02930 AT4G11600 AT4G13430 AT4G13930…
4.05487e-10	101	858	Translation	AT1G07930 AT1G07940 AT1G09810 AT1G13950 AT1G15870 AT1G18070 AT1G18080 AT1G25350 AT1G29880 AT1G45332 AT1G72370 AT1G74050 AT1G74270 AT2G32070 AT2G37190 AT3G01800 AT3G05560 AT3G12930 AT3G16810 AT3G17040 AT3G20800 AT3G49910 AT3G53430 AT4G02930 AT4G11120 AT4G16720 AT4G20360 AT4G29060 AT4G31180 AT4G36130 AT5G02050 AT5G02960 AT5G12110 AT5G16715 AT5G22250 AT5G24510 AT5G39850 AT5G48760 AT5G56710 ATMG00560…
5.12235e-10	101	863	Peptide biosynthetic process	AT1G07930 AT1G07940 AT1G09810 AT1G13950 AT1G15870 AT1G18070 AT1G18080 AT1G25350 AT1G29880 AT1G45332 AT1G72370 AT1G74050 AT1G74270 AT2G32070 AT2G37190 AT3G01800 AT3G05560 AT3G12930 AT3G16810 AT3G17040 AT3G20800 AT3G49910 AT3G53430 AT4G02930 AT4G11120 AT4G16720 AT4G20360 AT4G29060 AT4G31180 AT4G36130 AT5G02050 AT5G02960 AT5G12110 AT5G16715 AT5G22250 AT5G24510 AT5G39850 AT5G48760 AT5G56710 ATMG00560…
1.01659e-09	107	949	Amide biosynthetic process	AT1G07930 AT1G07940 AT1G09430 AT1G09810 AT1G13950 AT1G15870 AT1G18070 AT1G18080 AT1G25350 AT1G29880 AT1G45332 AT1G72370 AT1G74050 AT1G74270 AT2G32070 AT2G37190 AT3G01800 AT3G05560 AT3G12930 AT3G16810 AT3G17040 AT3G20800 AT3G49910 AT3G53430 AT4G02930 AT4G11120 AT4G16720 AT4G20360 AT4G29060 AT4G31180 AT4G36130 AT5G02050 AT5G02960 AT5G05980 AT5G12110 AT5G16715 AT5G22250 AT5G24510 AT5G39850 AT5G42000…
1.03437e-09	44	242	Chloroplast organization	AT1G21150 AT1G52080 AT1G56200 AT1G64810 AT1G69200 AT2G03050 AT2G26570 AT3G18870 AT3G25690 AT3G54090 AT3G56290 AT5G07900 AT5G55280 AT5G64950 AT2G30950 AT4G20360 AT1G04770 AT1G24490 AT1G49510 AT1G63680 AT1G78600 AT2G16365 AT2G26840 AT2G31270 AT2G46340 AT3G07700 AT3G18420 AT3G19220 AT3G47520 AT4G10620 AT4G13670 AT4G16390 AT4G28740 AT4G34740 AT5G15450 AT5G17790 AT5G24020 AT5G26742 AT5G35220 AT5G40270…
8.09454e-09	116	1101	Cellular amide metabolic process	AT1G07930 AT1G07940 AT1G09430 AT1G09810 AT1G13950 AT1G15870 AT1G18070 AT1G18080 AT1G25350 AT1G29880 AT1G36370 AT1G45332 AT1G72370 AT1G74050 AT1G74270 AT1G78380 AT2G29420 AT2G32070 AT2G37190 AT3G01800 AT3G05560 AT3G12930 AT3G16810 AT3G17040 AT3G20800 AT3G49910 AT3G53430 AT4G02930 AT4G11120 AT4G11820 AT4G13930 AT4G16720 AT4G20360 AT4G29060 AT4G31180 AT4G36130 AT5G02050 AT5G02960 AT5G05980 AT5G12110…
1.02897e-08	66	493	Response to metal ion	AT4G14880 AT4G35090 AT1G01060 AT1G07590 AT1G07930 AT1G07940 AT1G18080 AT1G29880 AT1G36370 AT1G42970 AT1G49010 AT1G53240 AT1G60710 AT1G65930 AT1G68560 AT1G70170 AT1G78380 AT2G05830 AT2G21660 AT2G23350 AT2G32700 AT2G36530 AT2G39920 AT2G47470 AT3G01860 AT3G04120 AT3G08590 AT3G12670 AT3G13860 AT3G15352 AT3G19170 AT3G23990 AT3G46970 AT3G48000 AT3G52880 AT3G55440 AT3G56070 AT3G58610 AT3G60190 AT4G02930…
1.06257e-08	103	941	Peptide metabolic process	AT1G07930 AT1G07940 AT1G09810 AT1G13950 AT1G15870 AT1G18070 AT1G18080 AT1G25350 AT1G29880 AT1G45332 AT1G72370 AT1G74050 AT1G74270 AT1G78380 AT2G29420 AT2G32070 AT2G37190 AT3G01800 AT3G05560 AT3G12930 AT3G16810 AT3G17040 AT3G20800 AT3G49910 AT3G53430 AT4G02930 AT4G11120 AT4G16720 AT4G20360 AT4G29060 AT4G31180 AT4G36130 AT5G02050 AT5G02960 AT5G12110 AT5G16715 AT5G22250 AT5G24510 AT5G39850 AT5G48760…
2.12607e-08	108	1018	Response to inorganic substance	AT1G27510 AT3G50980 AT4G21870 AT4G35090 AT5G14570 AT3G04120 AT4G14880 AT5G23310 AT1G01060 AT1G07590 AT1G07930 AT1G07940 AT1G11650 AT1G18080 AT1G29880 AT1G32450 AT1G36370 AT1G42970 AT1G49010 AT1G53240 AT1G60710 AT1G65930 AT1G68560 AT1G70170 AT1G73260 AT1G78380 AT2G05100 AT2G05830 AT2G20880 AT2G21660 AT2G23350 AT2G25180 AT2G32700 AT2G36530 AT2G39920 AT2G47180 AT2G47470 AT2G47900 AT3G01860 AT3G05640…
2.12607e-08	24	91	Chlorophyll metabolic process	AT1G74470 AT4G13250 AT4G15560 AT4G18480 AT4G36530 AT1G44446 AT1G58290 AT1G69740 AT3G44880 AT3G48730 AT5G13630 AT5G18660 AT5G54190 AT2G25180 AT1G56200 AT1G78600 AT2G40400 AT3G01910 AT4G10620 AT5G35750 AT5G40850 AT5G50920 AT5G56860 AT3G22840
7.11832e-08	25	104	Porphyrin-containing compound metabolic process	AT1G69740 AT1G74470 AT3G48730 AT4G13250 AT4G15560 AT4G18480 AT4G36530 AT5G40850 AT1G44446 AT1G58290 AT2G26550 AT3G44880 AT5G13630 AT5G18660 AT5G54190 AT2G25180 AT1G56200 AT1G78600 AT2G40400 AT3G01910 AT4G10620 AT5G35750 AT5G50920 AT5G56860 AT3G22840
8.35888e-08	25	105	Tetrapyrrole metabolic process	AT1G69740 AT1G74470 AT3G48730 AT4G13250 AT4G15560 AT4G18480 AT4G36530 AT5G40850 AT1G44446 AT1G58290 AT2G26550 AT3G44880 AT5G13630 AT5G18660 AT5G54190 AT2G25180 AT1G56200 AT1G78600 AT2G40400 AT3G01910 AT4G10620 AT5G35750 AT5G50920 AT5G56860 AT3G22840
1.18105e-07	44	283	Photosynthesis	AT1G03600 AT1G15820 AT1G29930 AT1G61520 AT2G05100 AT2G05620 AT2G15820 AT2G34430 AT3G08940 AT3G47470 AT3G54890 AT3G61470 AT4G09650 AT4G10340 AT5G42270 AT5G54270 AT1G54130 AT1G64860 AT1G03130 AT1G16720 AT1G42970 AT1G44575 AT1G74470 AT1G77090 AT2G01590 AT2G26550 AT3G14940 AT3G22840 AT3G55250 AT4G18480 AT4G28660 AT5G13630 AT5G38430 AT5G54190 AT1G55370 AT1G61800 AT1G64810 AT2G30950 AT2G34860 AT3G15850…
3.68846e-07	166	1883	Oxidation-reduction process	AT1G07420 AT1G11680 AT1G13700 AT2G05620 AT2G24190 AT2G37240 AT3G15840 AT3G19270 AT3G46970 AT3G61220 AT4G09650 AT4G35830 AT5G11770 AT5G58330 AT5G65840 AT4G01100 AT5G23310 AT1G02205 AT1G06620 AT1G09480 AT1G14290 AT1G14520 AT1G15710 AT1G15950 AT1G18000 AT1G37130 AT1G42970 AT1G43560 AT1G44446 AT1G49390 AT1G52340 AT1G53240 AT1G57770 AT1G58290 AT1G59730 AT1G59960 AT1G60680 AT1G60690 AT1G60710 AT1G60730…
4.85662e-07	167	1906	Small molecule metabolic process	AT1G09430 AT1G11790 AT1G14520 AT1G18640 AT1G22100 AT1G25350 AT1G29880 AT1G31220 AT1G32440 AT1G36370 AT1G37130 AT1G42970 AT1G52340 AT1G55090 AT1G65930 AT1G73805 AT1G77760 AT1G78440 AT1G78570 AT1G79550 AT2G05830 AT2G13560 AT2G18250 AT2G21940 AT2G29690 AT2G33040 AT2G34770 AT2G36530 AT2G43710 AT3G04120 AT3G06470 AT3G10050 AT3G12670 AT3G18680 AT3G23940 AT3G48560 AT3G55440 AT3G58610 AT3G59480 AT3G59890…
8.52418e-07	11	22	Cytidine to uridine editing	AT1G11430 AT3G15000 AT3G20930 AT4G20020 AT3G11460 AT3G14330 AT4G14050 AT4G30700 AT5G52630 AT5G61030 AT5G66520
1.107e-06	29	155	Rhythmic process	AT1G22770 AT1G68050 AT2G40080 AT3G15620 AT3G54500 AT5G64170 AT1G01060 AT2G46790 AT3G46640 AT4G35090 AT5G02810 AT5G24470 AT5G42900 AT5G60100 AT1G15950 AT2G16365 AT2G21660 AT3G01060 AT3G04910 AT3G26740 AT3G51550 AT4G13930 AT4G15920 AT5G56860 AT5G52660 AT3G20810 AT3G50000 AT3G57040 AT5G11260
1.107e-06	28	146	Circadian rhythm	AT1G22770 AT1G68050 AT2G40080 AT3G15620 AT3G54500 AT5G64170 AT4G35090 AT1G15950 AT2G16365 AT2G21660 AT3G01060 AT3G04910 AT3G26740 AT3G46640 AT3G51550 AT4G13930 AT4G15920 AT5G56860 AT5G60100 AT1G01060 AT5G52660 AT2G46790 AT3G20810 AT3G50000 AT3G57040 AT5G02810 AT5G11260 AT5G42900
1.13737e-06	84	786	Small molecule biosynthetic process	AT1G09430 AT1G11790 AT1G18640 AT1G22100 AT1G36370 AT1G52340 AT1G73805 AT1G78440 AT1G79550 AT2G05830 AT2G21940 AT2G29690 AT3G06470 AT3G10050 AT3G23940 AT3G48560 AT3G55440 AT3G58610 AT3G59890 AT4G13930 AT4G14880 AT4G25420 AT4G37870 AT5G04590 AT5G05980 AT5G10480 AT5G14060 AT5G17920 AT5G40270 AT5G48840 AT5G58730 AT4G05160 AT1G10070 AT1G14520 AT1G15710 AT1G19440 AT1G19640 AT1G31860 AT1G33320 AT1G65290…
1.1695e-06	18	65	Chlorophyll biosynthetic process	AT1G74470 AT4G15560 AT4G18480 AT1G44446 AT1G58290 AT1G69740 AT3G48730 AT5G13630 AT5G18660 AT5G54190 AT2G25180 AT1G78600 AT2G40400 AT4G10620 AT5G40850 AT5G50920 AT5G56860 AT3G22840
1.199e-06	14	39	Photosynthesis, light harvesting	AT1G15820 AT1G29930 AT1G61520 AT2G05100 AT2G34430 AT3G08940 AT3G47470 AT3G54890 AT3G61470 AT4G10340 AT5G42270 AT5G54270 AT1G03600 AT2G30950
1.21859e-06	11	23	Photosynthesis, light harvesting in photosystem I	AT1G15820 AT1G29930 AT1G61520 AT2G05100 AT2G34430 AT3G08940 AT3G47470 AT3G54890 AT3G61470 AT4G10340 AT5G54270
2.5885e-06	19	76	Tetrapyrrole biosynthetic process	AT1G69740 AT1G74470 AT3G48730 AT4G15560 AT4G18480 AT5G40850 AT1G44446 AT1G58290 AT5G13630 AT5G18660 AT5G54190 AT2G25180 AT1G78600 AT2G26550 AT2G40400 AT4G10620 AT5G50920 AT5G56860 AT3G22840
3.17889e-06	11	25	Base conversion or substitution editing	AT1G11430 AT3G15000 AT3G20930 AT4G20020 AT3G11460 AT3G14330 AT4G14050 AT4G30700 AT5G52630 AT5G61030 AT5G66520
